# Supplementary material for: Identification of single nucleotide polymorphisms of PIK3R1 and DUSP1 genes and their genetic associations with milk production traits in dairy cows
Source: J Anim Sci Biotechnol. 2019 Nov 6;10:81. doi: 10.1186/s40104-019-0392-z (PMC6833155; doi:10.1186/s40104-019-0392-z)
Supplement: Supplementary file 2 — Additional file 2. Table S2. Additive, dominant and allele substitution effects of SNPs on milk production traits in Chinese Holstein. [file 40104_2019_392_MOESM2_ESM.xlsx]

## Sheet: PIK3R1
Table S3-1 Additive, dominant and allele substitution effects of SNPs in PIK3R1 on milk production traits in Chinese Holstein.
SNP	GenBank no.	Lactation	Genetic effects	Milk yield, kg	Fat yield, kg	Fat percentage, %	Protein yield, kg	Protein percentage, %
c.*208G>A	rs42590258	1	Additive effect (a)	74.26	3.85*	0.0112	0.74	-0.0166**
			Dominant effect (d)	-122.02*	-2.73	0.018	-2.77	0.0097
			Substitution effect (α)	39.49	3.07*	0.0163	-0.05	-0.0139**
		2	Additive effect (a)	131.7**	3.73	-0.0013	3.02	-0.0087
			Dominant effect (d)	-75.97	4.14	0.058*	-3.5	-0.0108
			Substitution effect (α)	110.06*	4.91**	0.0152	2.02	-0.0118
c.*2776T>C	rs210389799	1	Additive effect (a)	-48.76	-3.54	-0.0192	-2.48	-0.0082
			Dominant effect (d)	30.32	-0.09	-0.0114	1.25	0.0026
			Substitution effect (α)	-35.21	-3.58	-0.0243	-1.92	-0.0071
		2	Additive effect (a)	-33.2	-1.82	-0.0022	-1.51	-0.0068
			Dominant effect (d)	118.62	2.82	-0.0231	4.5*	0.0104
			Substitution effect (α)	19.81	-0.56	-0.0125	0.5	-0.0021
c.*2962T>C	rs208819656	1	Additive effect (a)	-73.36	-3.47	-0.007	-3.73**	-0.0036
			Dominant effect (d)	39.91	-1.58	-0.025	1.53	-0.0076
			Substitution effect (α)	-55.98	-4.16**	-0.0178	-3.06**	-0.0069
		2	Additive effect (a)	-78.83	-2.94	-0.0004	-2.52	-0.0046
			Dominant effect (d)	206.33**	5.99*	-0.0173	6.51**	0.006
			Substitution effect (α)	11	-0.33	-0.0079	0.31	-0.002
c.*6275T>A	rs41255622	1	Additive effect (a)	-91.92**	-3.98**	-0.0081	-3.26**	-0.0024
			Dominant effect (d)	-47.62	-0.13	0.0112	-0.98	0.0034
			Substitution effect (α)	-93.63**	-3.98**	-0.0077	-3.29**	-0.0023
		2	Additive effect (a)	-33.47	0.83	0.0119	0.03	0.0064
			Dominant effect (d)	-31.54	2.52	0.0259	-0.86	0.0029
			Substitution effect (α)	-34.6	0.92	0.0129	0.002	0.0065
g.11323546C>T	rs133655926	1	Additive effect (a)	77.92*	3.38*	0.0099	2.42*	0.0008
			Dominant effect (d)	-60.14	-0.39	0.0129	-1.02	0.0062
			Substitution effect (α)	75.49*	3.37*	0.0104	2.38*	0.001
		2	Additive effect (a)	87.91	1.08	-0.0158	1.95	-0.0041
			Dominant effect (d)	-20.98	3.56	0.0315	0.08	0.0061
			Substitution effect (α)	87.06	1.23	-0.0145	1.95	-0.0039
g.11323118G>A	rs211408208	1	Additive effect (a)	-62.63	-4.39*	-0.0014	-2.7	-0.0072
			Dominant effect (d)	54.49	-0.95	-0.0317	0.9	-0.0061
			Substitution effect (α)	-38.98	-4.8**	-0.0152	-2.31	-0.0099
		2	Additive effect (a)	-14.8	-0.7	-0.0038	-0.07	-0.0025
			Dominant effect (d)	131.09	2.97	-0.0218	4.34*	0.0056
			Substitution effect (α)	42.09	0.59	-0.0133	1.81	-2e-05
Note: * indicates P value < 0.05; ** indicates P value < 0.01.

## Sheet: DUSP1
Table S3-2 Additive, dominant and allele substitution effects of SNPs in DUSP1 on milk production traits in Chinese Holstein.
SNP	GenBank no.	Lactation	Genetic effects	Milk yield (kg)	Fat yield (kg)	Fat percentage (%)	Protein yield (kg)	Protein percentage (%)
g.4453141T>G	rs207593520	1	Additive effect (a)	-43.15	-4.27**	-0.0309	-1.55	-0.0046
			Dominant effect (d)	18.83	3.15	0.0271	-1.16	-0.0157*
			Substitution effect (α)	-37.5	-3.33*	-0.0228	-1.9	-0.0093
		2	Additive effect (a)	211.33**	5.07**	0.0206	3.49*	0.0005
			Dominant effect (d)	-80.47	-6.42*	-0.0368	-1.74	0.0059
			Substitution effect (α)	187.19**	3.14	0.0095	2.96*	0.0023
c.*1505G>A	rs208460068	1	Additive effect (a)	117.11*	1.99	-0.0176	3.31*	-0.0016
			Dominant effect (d)	-131.33*	-0.77	0.0372	-4.92**	-0.0102
			Substitution effect (α)	66.1	1.69	-0.0032	1.4	-0.0056
		2	Additive effect (a)	363.4**	8.4**	-0.038	10.63**	-0.002
			Dominant effect (d)	-139.1	1.86	0.0428	-4.07	0.0022
			Substitution effect (α)	309.35**	9.12**	-0.0214	9.04**	-0.0011
g.4448024C>T	rs209154772	1	Additive effect (a)	-122.37**	-2	0.02	-3.51**	0.0034
			Dominant effect (d)	-113.49*	0.49	0.0417	-4.57**	-0.0113
			Substitution effect (α)	-164.89**	-1.81	0.0356	-5.22**	-0.0009
		2	Additive effect (a)	-327.81**	-8.68**	0.0267	-9.03**	0.0066
			Dominant effect (d)	-173.51*	-2.15	0.0266	-5.02*	0.0055
			Substitution effect (α)	-392.81**	-9.49**	0.0367	-10.91**	0.0087
g.4447105C>G	rs210000760	1	Additive effect (a)	-121.08**	-1.79	0.0219	-3.24*	0.0046
			Dominant effect (d)	-144.8*	-0.53	0.0435	-5.19**	-0.0085
			Substitution effect (α)	-175.24**	-1.99	0.0382	-5.19**	0.0014
		2	Additive effect (a)	-343.69**	-8.02**	0.0347	-9.59**	0.0043
			Dominant effect (d)	-131.74	-0.99	0.0243	-4.14*	0.003
			Substitution effect (α)	-392.98**	-8.39**	0.0437	-11.14**	0.0054
Note: * indicates p value < 0.05; ** indicates p value < 0.01.
